# Supplementary material for: Factors that influence response classifications in chemotherapy treated patient-derived xenografts (PDX)
Source: PeerJ. 2019 Mar 28;7:e6586. doi: 10.7717/peerj.6586 (PMC6441558; doi:10.7717/peerj.6586)
Supplement: Table S1 [file peerj-07-6586-s002.xlsx]

## Sheet: Sheet2
	Day 21				Day 28
	TC	RTC	RTV.mean	RTV.median	TC	RTC	RTV.mean	RTV.median
Treatment Tumor Volume at Enrollment	-0.04634		0.0357143	0.025	0.167857	0.0857143	0.128571	0.0785714
Standard Deviation of Treatment Tumor Volume at Enrollment	-0.00714286	-0.00178731	-0.00714286	0.00357143	-0.1	-0.0928571	-0.0821429	-0.114286
Control Tumor Volume at Enrollment	0.0107143	0.0196604	0.0107143	0	0.132143	0.0642857	0.1	0.05
Standard Deviation of Tumor Volume at Enrollment	-0.0142857	-0.0268097	-0.0142857	-0.00357143	-0.0571429	-0.0928571	-0.0357143	-0.0928571
Average Volume across All Groups	0	0.00893655	0	-0.00714286	0.125	0.0535714	0.0928571	0.0464286
Standard Deviation of Volume across All Groups	0.0428571	0.0446828	0.0428571	0.0642857	-0.0321429	-0.0357143	-0.0107143	-0.0428571
Growth Rate of Control Tumors	0.475	0.512958	0.475	0.471429	0.417857	0.446429	0.385714	0.446429

## Sheet: Rho
Rho	Day 21				Day 28
	TC	RTC	RTV.mean	RTV.median	TC	RTC	RTV.mean	RTV.median
Treatment Tumor Volume at Enrollment	-0.04634	-0.08481	-0.052	-0.00487	-0.02205	-0.07148	-0.04184	-0.0208255
Standard Deviation of Treatment Tumor Volume at Enrollment	-0.235835	-0.281908	-0.241839	-0.168207	-0.234157	-0.275422	-0.246904	-0.16848
Control Tumor Volume at Enrollment	-0.16848	-0.0936254	-0.056848	-0.0181059	-0.0351799	-0.0797373	-0.0527205	-0.0347092
Standard Deviation of Control Tumor Volume at Enrollment	-0.144841	-0.178714	-0.154597	-0.121488	-0.156199	-0.198124	0.171857	-0.15197
Average Volume across All Groups	-0.0570357	-0.0926873	-0.0572233	-0.0161358	-0.0334913	-0.0797373	-0.0502814	-0.0326454
Standard Deviation of Volume across All Groups	-0.166229	-0.211642	-0.172795	-0.104695	-0.175993	-0.219325	-0.189118	-0.130394
Growth Rate of Control Tumors	-0.387805	-0.385853	-0.363602	-0.347671	-0.394765	-0.404878	-0.378612	-0.404878

## Sheet: pvalue
p-value	21 Day				28 Day
	TC	RTC	RTV.mean	RTV.median	TC	RTC	RTV.mean	RTV.median
Treatment Tumor Volume at Enrollment	0.7759	0.6029	0.7494	0.9762	0.8926	0.6602	0.7972	0.8985
Standard Deviation of Treatment Tumor Volume at Enrollment	0.1426	0.07801	0.1325	0.2995	0.1459	0.08559	0.1244	0.2976
Control Tumor Volume at Enrollment	0.712	0.5655	0.7268	0.9117	0.8294	0.6237	0.7459	0.8313
Standard Deviation of Tumor Volume at Enrollment	0.3712	0.2699	0.3396	0.4552	0.3358	0.2196	0.2879	0.3479
Average Volume across All Groups	0.7259	0.5695	0.725	0.9213	0.8374	0.6237	0.7573	0.8412
Standard Deviation of Volume across All Groups	0.3041	0.1899	0.2852	0.5203	0.2774	0.6237	0.2416	0.4212
Growth Rate of Control Tumors	0.01394	0.01393	0.02166	0.02793	0.01171	0.01003	0.01654	0.01003
